# Reduced order modeling and analysis of the human complement system

Adithya Sagar, Wei Dai<sup>#</sup>, Mason Minot<sup>#</sup>, and Jeffrey D. Varner<sup>\*</sup>

School of Chemical and Biomolecular Engineering

Cornell University, Ithaca NY 14853

**Running Title:** A reduced order model of complement

**To be submitted:** *Scientific Reports*

<sup>#</sup> Denotes equal contribution

<sup>\*</sup>Corresponding author:

Jeffrey D. Varner,

Professor, School of Chemical and Biomolecular Engineering,

244 Olin Hall, Cornell University, Ithaca NY, 14853

Email: [jdv27@cornell.edu](mailto:jdv27@cornell.edu)

Phone: (607) 255 - 4258

Fax: (607) 255 - 9166

## Abstract

Complement is an important pathway in innate immunity, inflammation, and many disease processes. However, despite its importance, there have been few validated mathematical models of complement activation. In this study, we developed an ensemble of experimentally validated reduced order complement models. We combined ordinary differential equations with logical rules to produce a compact yet predictive complement model. The model, which described the lectin and alternative pathways, was an order of magnitude smaller than comparable models in the literature. We estimated an ensemble of model parameters from *in vitro* dynamic measurements of the C3a and C5a complement proteins. Subsequently, we validated the model on unseen C3a and C5a measurements not used for model training. Despite its small size, the model was surprisingly predictive. Global sensitivity and robustness analysis suggested complement was robust to any single therapeutic intervention. Only the knockdown of both C3 and C5 consistently reduced C3a and C5a formation from all pathways. Taken together, we developed a reduced order complement model that was computationally inexpensive, and could easily be incorporated into pre-existing or new pharmacokinetic models of immune system function. The model described experimental data, and predicted the need for multiple points of therapeutic intervention to fully disrupt complement activation.

**Keywords:** Complement, systems biology, reduced order modeling, biochemical engineering

# Introduction

Complement is an important pathway in innate immunity. It plays a significant role in inflammation, host defense as well as many disease processes. Complement was discovered in the late 1880s where it was found to 'complement' the bactericidal activity of natural antibodies (1). However, research over the past decade has shown the importance of complement extends beyond innate immunity. For example, complement contributes to tissue homeostasis (2), and has been linked with several diseases including Alzheimers, Parkinson's, multiple sclerosis, schizophrenia, rheumatoid arthritis and sepsis (3, 4). Complement also plays positive and negative roles in cancer; attacking tumor cells with altered surface proteins in some cases, while potentially contributing to tumor growth in others (5, 6). Lastly, several other important biochemical systems are integrated with complement including the coagulation cascade, the autonomous nervous system and inflammation (6). Thus, complement is important in a variety of beneficial and potentially harmful functions in the body. However, despite its importance, there have been relatively few approved complement specific therapeutics, largely because of safety concerns and challenging pharmacokinetic constraints.

The complement cascade involves many soluble and cell surface proteins, receptors and regulators (7, 8). The outputs of complement are the Membrane Attack Complex (MAC), and the inflammatory mediator proteins C3a and C5a. The membrane attack complex, generated during the terminal phase of the response, forms transmembrane channels which disrupt the membrane integrity of targeted cells, leading to cell lysis and death. On the other hand, the C3a and C5a proteins act as a bridge between innate and adaptive immunity, and play an important role in regulating inflammation (5). Complement activation takes places through three pathways: the classical, the lectin and the alternate pathways. The classical pathway is triggered by antibody recognition of foreign antigens or other pathogens. A multimeric protein complex C1 binds antibody-antigen complexes

and undergoes a conformational change, leading to an activated form with proteolytic activity. The activated complex cleaves soluble complement proteins C4 and C2 into C4a, C4b, C2a and C2b, respectively. The C4a and C2b fragments bind to form the C4bC2a protease, also known as the classical pathway C3 convertase (CP C3 convertase). The lectin pathway is initiated through the binding of L-ficolin or Mannose Binding Lectin (MBL) to carbohydrates on the surfaces of bacterial pathogens. These complexes, in combination mannose-associated serine proteases 1 and 2 (MASP-1/2), also cleave C4 and C2, leading to additional CP C3 convertase. Thus, the classical and lectin pathways, initiated by different cues on foreign surfaces, converge at the CP C3 convertase. However, the alternate pathway works differently. It is activated by a 'tickover' mechanism in which complement protein C3 is spontaneously hydrolyzed to form an activated intermediate C3w; C3w recruits factor B and factor D, leading to the formation of C3wBb. C3wBb cleaves C3 into C3a and C3b, where the C3b fragment further recruits additional factor B and factor D to form C3bBb, the alternate C3 convertase (AP C3 convertase) (9). The role of classical and alternate C3 convertases is varied. First, AP C3 convertases mediate signal amplification. AP C3 convertases cleave C3 into C3a and C3b; the C3b fragment is then free to form additional alternate C3 convertases, thereby forming a positive feedback loop. Next, AP/CP C3 convertases link complement initiation with the terminal phase of the cascade through the formation of C5 convertases. Both classical and alternate C3 convertases can recruit C3b subunits to form the classical pathway C5 convertase (C4bC2aC3b, CP C5 convertase), and the alternate pathway C5 convertase (C3bBbC3b, AP C5 convertase), respectively. Both C5 convertases cleave C5 into the C5a and C5b fragments. The C5b fragment, along with the complement proteins C6, C7, C8 and multiple C9s, form the membrane attack complex. On the other hand, both C3a and C5a are important inflammatory signals involved in several responses (7, 8). Thus, the complement cascade attacks invading pathogens, while acting as a beacon for adaptive immunity.

The complement cascade is regulated by plasma and host cell proteins which balance host safety with effectiveness. The initiation of the classical pathway via complement protein C1 is controlled by the C1 Inhibitor (C1-Inh); C1-Inh irreversibly binds to and deactivates the active subunits of C1, preventing chronic complement activation (10). Regulation of upstream processes in the lectin and alternate pathways also occurs through the interaction of the C4 binding protein (C4BP) with C4b, and factor H with C3b (11). Interestingly, both factor H and C4BP are capable of binding their respective targets while in convertase complexes as well. At the host cell surface, membrane cofactor protein (MCP or CD46) can interact with C4b and C3b, which protects the host cell from complement self-activation (12). Delay accelerating factor (DAF or CD55) also recognizes and dissociates both C3 and C5 convertases on host cell surfaces (13). More generally the well known inflammation regulator Carboxypeptidase-N has broad activity against the complement proteins C3a, C4a, and C5a, rendering them inactive by cleavage of carboxyl-terminal arginine and lysine residues (14). Although Carboxypeptidase-N does not directly influence complement activation, it silences the important inflammatory signals produced by complement. Lastly, assembly of the MAC complex itself can be inhibited by vitronectin and clusterin in the plasma, and CD59 at the host surface (15, 16). Thus, there are many points of control which influence complement across the three activation pathways.

Developing quantitative mathematical models of complement will be crucial to fully understanding its role in the body. Traditionally, complement models have been formulated as systems of linear or non-linear ordinary differential equations (ODEs). For example, Hirayama et al., modeled the classical complement pathway as a system of linear ODEs (17), while Korotaevskiy and co-workers modeled the classical, lectin and alternate pathways as a system of non-linear ODEs (18). More recently, large mechanistic models of sections of complement have also been proposed. For example, Liu et al., analyzed the formation of the classical and lectin C3 convertases, and the regulatory role of C4BP

79 using a system of 45 non-linear ODEs with 85 parameters (19). Zewde and co-workers  
80 constructed a detailed mechanistic model of the alternative pathway which consisted of  
81 107 ODEs and 74 kinetic parameters and delineated between the fluid, host and pathogen  
82 surfaces (16). However, these previous modeling studies involved large models with little  
83 experimental validation. Thus, while these models are undoubtedly important theoretical  
84 tools, it is unclear if they can describe or quantitatively predict complement measure-  
85 ments. The central challenge of complement model identification is the estimation of  
86 model parameters from experimental measurements. Unlike other important cascades,  
87 such as coagulation where there are well developed experimental tools and publicly avail-  
88 able data sets, the data for complement is relatively sparse. Data sets with missing or  
89 incomplete data, and limited dynamic data also make the identification of large mecha-  
90 nistic complement models difficult. Thus, reduced order approaches which describe the  
91 biology of complement using a limited number of species and parameters could be impor-  
92 tant for pharmacokinetic model development, and for our understanding of the varied role  
93 of complement in the body.

## Results

In this study, we developed an ensemble of experimentally validated reduced order complement models using multiobjective optimization. The modeling approach combined ordinary differential equations with logical rules to produce a complement model with a limited number of equations and parameters. The reduced order model, which described the lectin and alternative pathways, consisted of 18 differential equations with 28 parameters. Thus, the model was an order of magnitude smaller and included more pathways than comparable models in the literature. We estimated an ensemble of model parameters from *in vitro* time series measurements of the C3a and C5a complement proteins. Subsequently, we validated the model on unseen C3a and C5a measurements that were not used for model training. Despite its small size, the model was surprisingly predictive. After validation, we performed global sensitivity and robustness analysis to estimate which parameters and species controlled model performance. Sensitivity analysis suggested CP C3 and C5 convertase parameters were critical, while robustness analyses suggested complement was robust to any single therapeutic intervention; only the knockdown of both C3 and C5 consistently reduced C3a and C5a formation for all cases. Taken together, we developed a reduced order complement model that was computationally inexpensive, and could easily be incorporated into pre-existing or new pharmacokinetic models of immune system function. The model described experimental data, and predicted the need for multiple points of intervention to disrupt complement activation.

**Reduced order complement network.** The complement model described the alternate and lectin pathways (Fig. 1). A trigger event initiated the lectin pathway (encoded as a logical rule), which activated the cleavage of C2 and C4 into C2a, C2b, C4a and C4b respectively. Classical Pathway (CP) C3 convertase (C4aC2b) then catalyzed the cleavage of C3 into C3a and C3b. The alternate pathway was initiated through the spontaneous hydrolysis of C3 into C3a and C3b (not C3w). The C3b fragment generated by hydroly-

sis (or by CP C3 convertase) could then form the alternate pathway (AP) C3 convertase (C3bBb). We did not consider C3w, nor the formation of the initial alternate C3 convertase (C3wBb). Rather, we assumed C3w was equivalent to C3b and only modeled the formation of the main AP C3 convertase. Both the CP and AP C3 convertases catalyzed the cleavage of C3 into C3a and C3b. A second C3b fragment could then bind with either the CP or AP C3 convertase to form the CP or AP C5 convertase (C4bC2aC3b or C3bBbC3b). Both C5 convertases catalyzed the cleavage of C5 into the C5a and C5b fragments. In this initial study, we simplified the model by assuming both factor B and factor D were in excess. However, we did explicitly account for two control proteins, factor H and C4BP. Lastly, we did not consider MAC formation, instead we stopped at C5a and C5b. Lectin pathway activation, and C3/C5 convertase activity was modeled using a combination of saturation kinetics and non-linear transfer functions, which facilitated a significant reduction in the size of the model while maintaining performance. Binding interactions were modeled using mass-action kinetics, where we assumed all binding was irreversible. Thus, while the reduced order complement model encoded significant biology, it was highly compact consisting of only 18 differential equations and 28 model parameters. Next, we estimated an ensemble of model parameters from time series measurements of the C3a and C5a complement proteins.

**Estimating an ensemble of reduced order complement models.** A critical challenge for the development of any dynamic model is the estimation of model parameters. We estimated an ensemble of complement model parameters using *in vitro* time-series data sets generated with and without zymosan, a lectin pathway activator (20). The residual between model simulations and experimental measurements was minimized using the dynamic optimization with particle swarms (DOPS) routine, starting from a random parameter guess. The best fit parameter set estimated by DOPS was then used to generate a parameter ensemble using multiobjective optimization. Unless otherwise specified, all



initial conditions were assumed to be their mean physiological values. While we had significant training data, the parameter estimation problem was underdetermined (we were not able to uniquely determine model parameters). Thus, instead of using the best-fit yet uncertain parameter set generated by DOPS, we estimated an ensemble of probable parameter sets to quantify model uncertainty ( $N = 2100$ , see materials and methods). The complement model ensemble captured the behavior of both the alternate and lectin pathways (Fig. 2). For the alternate pathway, we used C3a and C5a measurements in the absence of zymosan (Fig. 2A and B). On the other hand, lectin pathway parameters were estimated from C3a and C5a measurements in the presence of 1mg/ml zymosan (Fig. 2C and D). The reduced order model reproduced a panel of alternate and lectin pathway data sets in the neighborhood of physiological factor and inhibitor concentrations. However, it was unclear whether the reduced order model could predict new data, without updating the model parameters. To address this question, we fixed the model parameters and simulated data sets not used for model training.

We tested the predictive power of the reduced order complement model with data not used during model training (Fig. 3). Six validation cases were considered, three for C3a and C5a, respectively. All model parameters and initial conditions were fixed for the validation simulations (with the exception of zymosan, and other experimentally mandated changes). The ensemble of reduced order models predicted the qualitative dynamics of C3a formation (Fig. 3, top), and C5a formation (Fig. 3, bottom) at three inducer concentrations. The rate of C3a formation and C3a peak time were directly proportional to initiator dose. Similarly, the C5a plateau and rate of formation were also directly proportional to initiator dose, with the lag time being indirectly proportional to initiator exposure for both C3a and C5a. However, there were shortcomings with model performance. First, while the overall C3a trend was captured (within the 99% confidence interval), the C3a dynamics were too fast with the exception of the low dose case. We believe the C3a time scale

was related to our choice of training data, how we modeled the tickover mechanism, and factor B and D limitation. We trained the model using either no or 1 mg/ml zymosan, but predicted cases in a different initiator range; comparing training to prediction, the model performance e.g., the shape of the C3a trajectory was biased towards either high or very low initiator doses. Next, tickover was modeled as a first-order generation processes where C3wBb formation and activity was lumped into the AP C3 convertase. Thus, we skipped an important upstream step which could strongly influence AP C3 convertase formation by slowing down the rate C3 cleavage into C3a and C3b. We also assumed both factor B and factor D were not limiting, thereby artificially accelerating the rate of AP C3 convertase formation. The C5a predictions followed a similar trend as C3a; we captured the long-time C5a behavior but over predicted the time scale of C5 cleavage. However, because the C5a time scale depends strongly upon C3 convertase formation, we can likely correct the C5 issues by fixing the rate of C3 cleavage. Despite these shortcomings, we qualitatively predicted unseen experimental measurements typically within the 99% confidence of the ensemble, for three inducer levels. Next, we used global sensitivity and robustness analysis to determine which parameters and species controlled the performance of the complement model.

**Global analysis of the reduced order complement model.** We conducted sensitivity analysis to estimate which parameters controlled the performance of the reduced order complement model. We calculated the total sensitivity of the C3a and C5a residual to changes in model parameters with and without zymosan (Fig. 4). In the absence of zymosan (where only the alternative pathway is active), the most sensitive parameter was the rate constant governing the assembly of the AP C3 convertase, as well as the rate constant controlling basal C3b formation. The C5a trajectory was sensitive to the AP C5 convertase kinetic parameters (Fig. 4A). Interestingly, neither the rate nor the saturation constant governing AP C3 convertase activity were sensitive in the absence of

zymosan. Thus, C3a formation in the alternative pathway was more heavily influenced by the spontaneous hydrolysis of C3, rather than AP C3 convertase activity, in the absence of zymosan. In the presence of zymosan, the C3a residual was controlled by the formation and activity of the CP C3 convertase, as well as tickover and degradation parameters. On the other hand, the C5a residual was controlled by the formation and activity of CP C5 convertase, and tickover C3b formation in the presence of zymosan (Fig. 4B). The lectin initiation parameters were sensitive, but to a lesser extent than CP convertase kinetic parameters and tickover C3b formation. Thus, sensitivity analysis suggested that CP C3/C5 convertase formation and activity dominated in the presence of zymosan, but tickover parameters and AP C5 convertase were more important without initiator. AP C3 convertase assembly was important, but its activity was not. Next, we compared the sensitivity results to current therapeutic approaches; pathways involving sensitive parameters have been targeted for clinical intervention (Fig. 4C). In particular, the sensitivity analysis suggested AP/CP C5 convertase inhibitors, or interventions aimed at attenuating C3 or C5 would most strongly influence complement performance. Thus, there was at least a qualitative overlap between sensitivity and the potential of biochemical efficacy. However, sensitivity coefficients are only a local measure of how small changes in parameters affect model performance. To more closely simulate a clinical intervention e.g., administration of an anti-complement inhibitor, we performed robustness analysis.

Robustness analysis suggested there was no single intervention that inhibited complement activation in the presence of both initiation pathways (Fig. 5). Robustness coefficients quantify the response of a protein to a macroscopic structural or operational perturbation to a biochemical network. Here, we computed how the C3a and C5a trajectories responded to a decrease in the initial abundance of C3 and/or C5 with and without lectin initiator. We simulated the addition of different doses of anti-complement inhibitor cocktails by decreasing the initial concentration of C3, C5 or the combination of C3 and

224 C5 by 50%, 90% and 99%. This would be conceptually analogous to the administration  
 225 of a C3 inhibitor e.g., Compstatin alone or combination with Eculizumab (Fig. 4C). The  
 226 response of the complement model to different knock-down magnitudes was non-linear; a  
 227 90% knock-down had an order of magnitude more impact than a 50% knock-down. As ex-  
 228 pected, a C5 knockdown had no effect on C3a formation for either the alternate (Fig. 5A)  
 229 or lectin pathways (Fig. 5B). However, C3a and to a greater extent C5a abundance de-  
 230 creased with decreasing C3 concentration in the alternate pathway (Fig. 5A). This agreed  
 231 with the sensitivity results; changes in AP C3-convertase formation affected the down-  
 232 stream dynamics of C5a formation. Thus, if we only considered the alternate pathway, C3  
 233 alone could be a reasonable target, especially given that C5a formation was surprisingly  
 234 robust to C5 levels in the alternate pathway. Yet, when both pathways were activated,  
 235 C5a levels were robust to the initial C3 concentration (Fig. 5B); even 1% of the nominal  
 236 C3 was able to generate enough AP/CP C5 convertase to maintain C5a formation. Thus,  
 237 the only reliable intervention that consistently reduced both C3a and C5a formation for all  
 238 cases was a knockdown of both C3 and C5. For example, a 90% decrease of both C3  
 239 and C5 reduced the formation of C5a by an order of magnitude, while C3a was reduced  
 240 to a lesser extent (Fig. 5B).

## Discussion

In this study, we developed an ensemble of experimentally validated reduced order complement models using multiobjective optimization. The modeling approach combined ordinary differential equations with logical rules to produce a complement model with a limited number of equations and parameters. The reduced order model, which described the lectin and alternative pathways, consisted of 18 differential equations with 28 parameters. Thus, the model was an order of magnitude smaller and included more pathways than comparable mathematical models in the literature. We estimated an ensemble of model parameters from *in vitro* time series measurements of the C3a and C5a complement proteins. Subsequently, we validated the model on unseen C3a and C5a measurements that were not used for model training. Despite its small size, the model was surprisingly predictive. After validation, we performed global sensitivity and robustness analysis to estimate which parameters and species controlled model performance. These analyses suggested complement was robust to any single therapeutic intervention. The only intervention that consistently reduced C3a and C5a formation for all cases was a knockdown of both C3 and C5. Taken together, we developed a reduced order complement model that was computationally inexpensive, and could easily be incorporated into pre-existing or new pharmacokinetic models of immune system function. The model described experimental data, and predicted the need for multiple points of intervention to disrupt complement activation.

Despite its importance, there has been a paucity of validated mathematical models of complement pathway activation. To our knowledge, this study is one of the first complement models that combined multiple initiation pathways with experimental validation of important complement products like C5a. However, there have been several theoretical models of components of the cascade in the literature. Liu and co-workers modeled the formation of C3a through the classical pathway using 45 non-linear ODEs (19). In

contrast, in this study we modeled lectin mediated C3a formation using only five ODEs. Though we did not model all the initiation interactions in detail, especially the cross-talk between the lectin and classical pathways, we successfully captured C3a dynamics with respect to different concentrations of lectin initiators. The model also captured the dynamics of C3a and C5a formed from the alternate pathway using only seven ODEs. The reduced order model predictions of C5a were qualitatively similar to the theoretical complement model of Zewde et al., which involved over 100 ODEs (16). However, we found that the C3a produced in the alternate pathway was nearly three orders of magnitude greater than the C5a generated. While this was in agreement with the experimental data (20), it differed from the theoretical predictions made by Zewde et al., who showed C3a was eight orders of magnitude greater than the C5a concentration (16). In our model, the time profile of both C3a and C5a generated changed with respect to the quantity of zymosan (the lectin pathway initiator). In particular, the C3a peak time was directly proportional to initiator, while the lag phase for generation was inversely proportional to the initiator concentration. Korotaevskiy et al. showed a similar trend using a theoretical model of complement, albeit for much shorter time scales (18). Thus, the reduced order complement model performed at least as well as existing larger mechanistic models, despite being significantly smaller.

Global analysis of the complement model suggested potentially important therapeutic targets. Complement malfunctions are implicated in a spectrum of diseases, however the development of complement specific therapeutics has been challenging (3, 21). Previously, we have shown that mathematical modeling and analysis can be useful tools to estimate therapeutically important mechanisms (22–25). In this study, we analyzed a validated ensemble of reduced order complement models to better understand the strengths and weaknesses of the cascade. In the presence of an initiator, C3a and C5a formation was sensitive to CP C3/C5 convertase assembly and activity, and to a lesser extent

lectin initiation parameters. Formation of the CP convertases can be inhibited by targeting upstream protease complexes like MASP-1,2 from the lectin pathway (or C1r, C1s from classical pathway). For example, Omeros, a protease inhibitor that targets the MASP-2 complex, has been shown to inhibit the formation of downstream convertases (26). Lamalizumab and Bikaciomab, which target factor B and factor D respectively, or naturally occurring proteins such as Cobra Venom Factor (CVF), an analogue of C3b, could also attenuate AP convertase formation (27–29). Removing supporting molecules could also destabilize the convertases. For example, Novemed Therapeutics developed the antibody, NM9401 against propedin, a small protein that stabilizes alternate C3 convertase (30). Lastly, convertase catalytic activity could be attenuated using small molecule protease inhibitors. All of these approaches are consistent with the results of the sensitivity analysis. On the other hand, robustness analysis suggested C3a and C5a generation could only be significantly attenuated by modulating the free levels of C3 and C5. The most commonly used anti-complement drug Eculizumab, targets the C5 protein (21). Several other antibodies targeting C5 are also being developed; for example, LFG316 targets C5 in Age-Related Macular Degeneration (31), while Mubodina is used to treat Atypical Hemolytic-Uremic Syndrome (aHUS) (32). Other agents such as Coversin (33) or the aptamer Zimura (34) could also be used to knockdown C5. The peptide inhibitor Compstatin and its derivatives are promising approaches for the inhibition of C3 (35). However, while the knockdown of C3 and C5 affect C3a and C5a levels downstream, the abundance, turnover rate and population variation of these proteins make them difficult targets (36, 37). For example, the eculizumab dosage must be significantly adjusted during the course of treatment for aHUS (38). A validated complement model, in combination with personalized pharmacokinetic models of immune system function, could be an important development for the field.

The performance of the complement model was impressive given its limited size. How-



ever, there are several questions that should be explored further. A logical progression for this work would be to expand the network to include the classical pathway and the formation of the membrane attack complex (MAC). However, time course measurements of MAC abundance (and MAC formation dynamics) are scarce, making the inclusion of MAC challenging. On the other hand, inclusion of classical pathway activation is straightforward. Liu et al., have shown cross-talk between the activation of the classical and lectin pathways through C reactive proteins (CRP) and L-ficolin (LF) under inflammation conditions (19). Thus, inclusion of these species, in addition to a lumped activation term for the classical pathway should allow us to capture classical activation. Next, we should address the C3a time scale issue. We believe the C3a time scale was related to our choice of training data, how we modeled the tickover mechanism, and factor B and D limitation. Tickover was modeled as a first-order generation processes where C3wBb formation and activity was lumped into the AP C3 convertase. Thus, we skipped an important step which could strongly influence AP C3 convertase formation by slowing down the rate C3 cleavage into C3a and C3b. The model should be expanded to include the C3wBb intermediate, where C3wBb catalyzes C3 cleavage at a slow rate compared to normal AP or CP C3 convertases. We also assumed both factor B and factor D were not limiting, thereby artificially accelerating the rate of AP C3 convertase formation. This shortcoming could be addressed by including balances around factor B and D, and including these species in the appropriate kinetic rates. The C5a predictions also had an accelerated time scale. However, because the C5a time scale depended strongly upon C3 convertase formation, we can likely correct the C5 issues by fixing the rate of C3 cleavage. Lastly, we should also consider including the C2-bypass pathway, which was not included in the model. The C2-bypass mediates lectin pathway activation, without the involvement of MASP-1/2. Thus, this pathway could be important for understanding the role of MASP-1/2 inhibitors on complement activation.



## Materials and Methods

**Formulation and solution of the complement model equations.** We used ordinary differential equations (ODEs) to model the time evolution of complement proteins ( $x_i$ ) in the reduced order model:

$$\frac{1}{\tau_i} \frac{dx_i}{dt} = \sum_{j=1}^{\mathcal{R}} \sigma_{ij} r_j(\mathbf{x}, \epsilon, \mathbf{k}) \quad i = 1, 2, \dots, \mathcal{M} \quad (1)$$

where  $\mathcal{R}$  denotes the number of reactions and  $\mathcal{M}$  denotes the number of proteins in the model. The quantity  $\tau_i$  denotes a time scale parameter for species  $i$  which captures unmodeled effects. For the current study,  $\tau$  scaled with the level of initiator ( $z$ ) for C5a and C5b;  $\tau_i = z/z^*$  for  $i = \text{C5a, C5b}$  where  $z^*$  was 1mg/ml,  $\tau_i = 1$  for all other species. The quantity  $r_j(\mathbf{x}, \epsilon, \mathbf{k})$  denotes the rate of reaction  $j$ . Typically, reaction  $j$  is a non-linear function of biochemical and enzyme species abundance, as well as unknown model parameters  $\mathbf{k}$  ( $\mathcal{K} \times 1$ ). The quantity  $\sigma_{ij}$  denotes the stoichiometric coefficient for species  $i$  in reaction  $j$ . If  $\sigma_{ij} > 0$ , species  $i$  is produced by reaction  $j$ . Conversely, if  $\sigma_{ij} < 0$ , species  $i$  is consumed by reaction  $j$ , while  $\sigma_{ij} = 0$  indicates species  $i$  is not connected with reaction  $j$ . Species balances were subject to the initial conditions  $\mathbf{x}(t_o) = \mathbf{x}_o$ .

Rate processes were written as the product of a kinetic term ( $\bar{r}_j$ ) and a control term ( $v_j$ ) in the complement model. The kinetic term for the formation of C4a, C4b, C2a and C2b, lectin pathway activation, and C3 and C5 convertase activity was given by:

$$\bar{r}_j = k_j^{max} \epsilon_i \left( \frac{x_s^\eta}{K_{js}^\eta + x_s^\eta} \right) \quad (2)$$

where  $k_j^{max}$  denotes the maximum rate for reaction  $j$ ,  $\epsilon_i$  denotes the abundance of the enzyme catalyzing reaction  $j$ ,  $\eta$  denotes a cooperativity parameter, and  $K_{js}$  denotes the saturation constant for species  $s$  in reaction  $j$ . We used mass action kinetics to model

protein-protein binding interactions within the network:

$$\bar{r}_j = k_j^{max} \prod_{s \in m_j^-} x_s^{-\sigma_{sj}} \quad (3)$$

where  $k_j^{max}$  denotes the maximum rate for reaction  $j$ ,  $\sigma_{sj}$  denotes the stoichiometric coefficient for species  $s$  in reaction  $j$ , and  $s \in m_j^-$  denotes the set of *reactants* for reaction  $j$ . We assumed all binding interactions were irreversible.

The control terms  $0 \leq v_j \leq 1$  depended upon the combination of factors which influenced rate process  $j$ . For each rate, we used a rule-based approach to select from competing control factors. If rate  $j$  was influenced by  $1, \dots, m$  factors, we modeled this relationship as  $v_j = \mathcal{I}_j(f_{1j}(\cdot), \dots, f_{mj}(\cdot))$  where  $0 \leq f_{ij}(\cdot) \leq 1$  denotes a regulatory transfer function quantifying the influence of factor  $i$  on rate  $j$ . The function  $\mathcal{I}_j(\cdot)$  is an integration rule which maps the output of regulatory transfer functions into a control variable. Each regulatory transfer function took the form:

$$f_{ij}(Z_i, k_{ij}, \eta_{ij}) = k_{ij}^{\eta_{ij}} Z_i^{\eta_{ij}} / (1 + k_{ij}^{\eta_{ij}} Z_i^{\eta_{ij}}) \quad (4)$$

where  $Z_i$  denotes the abundance of factor  $i$ ,  $k_{ij}$  denotes a gain parameter, and  $\eta_{ij}$  denotes a cooperativity parameter. In this study, we used  $\mathcal{I}_j \in \{min, max\}$  (39). If a process has no modifying factors,  $v_j = 1$ . The model equations were implemented in Julia and solved using the CVODE routine of the Sundials package (40, 41). The model code and parameter ensemble is freely available under an MIT software license and can be downloaded from <http://www.varnerlab.org>.

**Estimating an ensemble of complement model parameters.** We estimated a single initial parameter set using the Dynamic Optimization with Particle Swarms (DOPS) technique (42). DOPS is a novel hybrid meta-heuristic which combines a multi-swarm particle

swarm method with the dynamically dimensioned search approach of Shoemaker and colleagues (43). DOPS minimized the squared residual between simulated and C3a and C5a measurements with and without zymosan as a single objective. The best fit set estimated by DOPS served as the starting point for multiobjective ensemble generation using Pareto Optimal Ensemble Technique in the Julia programming language (JuPOETs) (44). JuPOETs is a multiobjective approach which integrates simulated annealing with Pareto optimality to estimate model ensembles on or near the optimal tradeoff surface between competing training objectives. JuPOETs minimized training objectives of the form:

$$O_j(\mathbf{k}) = \sum_{i=1}^{\mathcal{T}_j} \left( \hat{\mathcal{M}}_{ij} - \hat{y}_{ij}(\mathbf{k}) \right)^2 + \left( \frac{\mathcal{M}'_{ij} - \max y_{ij}}{\mathcal{M}'_{ij}} \right)^2 \quad (5)$$

subject to the model equations, initial conditions and parameter bounds  $\mathcal{L} \leq \mathbf{k} \leq \mathcal{U}$ . The first term in the objective function measured the shape difference between the simulations and measurements. The symbol  $\hat{\mathcal{M}}_{ij}$  denotes a scaled experimental observation (from training set  $j$ ) while the symbol  $\hat{y}_{ij}$  denotes the scaled simulation output (from training set  $j$ ). The quantity  $i$  denotes the sampled time-index and  $\mathcal{T}_j$  denotes the number of time points for experiment  $j$ . The scaled measurement is given by:

$$\hat{\mathcal{M}}_{ij} = \frac{\mathcal{M}_{ij} - \min_i \mathcal{M}_{ij}}{\max_i \mathcal{M}_{ij} - \min_i \mathcal{M}_{ij}} \quad (6)$$

Under this scaling, the lowest measured concentration become zero while the highest equaled one, where a similar scaling was defined for the simulation output. The second-term in the objective function quantified the absolute error in the estimated concentration scale, where the absolute measured concentration (denoted by  $\mathcal{M}'_{ij}$ ) was compared with the largest simulated value. In this study, we minimized two training objectives, the total C3a and C5a residual w/o zymosan ( $O_1$ ) and the total C3a and C5a residual for 1 mg/ml

zymosan ( $O_2$ ). JuPOETs identified an ensemble of  $N \simeq 2100$  parameter sets which were used for model simulations and uncertainty quantification subsequently. JuPOETs is open source, available under an MIT software license. The JuPOETs source code is freely available from the JuPOETs GitHub repository at <https://github.com/varnerlab/POETs.jl>. The objective functions used in this study are available in the GitHub model repository available from <http://varnerlab.org>.

**Sensitivity and robustness analysis of complement model performance.** We conducted global sensitivity and robustness analysis to estimate which parameters and species controlled the performance of the reduced order model. We computed the total variance-based sensitivity index of each parameter relative to the training residual for the C3a/C5a alternate and C3a/C5a lectin objectives using the Sobol method (45). The sampling bounds for each parameter were established from the minimum and maximum value for that parameter in the parameter ensemble. We used the sampling method of Saltelli *et al.* to compute a family of  $N(2d + 2)$  parameter sets which obeyed our parameter ranges, where  $N$  was the number of trials per parameters, and  $d$  was the number of parameters in the model (46). In our case,  $N = 400$  and  $d = 28$ , so the total sensitivity indices were computed using 23,200 model evaluations. The variance-based sensitivity analysis was conducted using the SALib module encoded in the Python programming language (47).

Robustness coefficients quantify the response of a marker to a structural or operational perturbation to the network architecture. Robustness coefficients were calculated as shown previously (48). Log-transformed robustness coefficients denoted by  $\hat{\alpha}(i, j, t_o, t_f)$  are defined as:

$$\hat{\alpha}(i, j, t_o, t_f) = \log_{10} \left[ \left( \int_{t_o}^{t_f} x_i(t) dt \right)^{-1} \left( \int_{t_o}^{t_f} x_i^{(j)}(t) dt \right) \right] \quad (7)$$

Here  $t_o$  and  $t_f$  denote the initial and final simulation time, while  $i$  and  $j$  denote the indices

428 for the marker and the perturbation, respectively. A value of  $\hat{\alpha}(i, j, t_o, t_f) > 0$ , indicates  
 429 increased marker abundance, while  $\hat{\alpha}(i, j, t_o, t_f) < 0$  indicates decreased marker abun-  
 430 dance following perturbation  $j$ . If  $\hat{\alpha}(i, j, t_o, t_f) \sim 0$ , perturbation  $j$  did not influence the  
 431 abundance of marker  $i$ . In this study, we perturbed the initial condition of C3 or C5 or  
 432 a combination of C3 and C5 by 50%, 90% and 99% and measured the area under the  
 433 curve (AUC) of C3a or C5a with and without lectin initiator. We computed the robustness  
 434 coefficients for a subset of the parameter ensemble.

## Competing interests

The authors declare that they have no competing interests.

## Author's contributions

J.V directed the study. A.S developed the reduced order complement model and the parameter ensemble. A.S, W.D and M.M analyzed the model ensemble, and generated figures for the manuscript. The manuscript was prepared and edited for publication by A.S, W.D, M.M and J.V.

## Acknowledgements

We gratefully acknowledge the suggestions from the anonymous reviewers to improve this manuscript.

## Funding

This study was supported by an award from the US Army and Systems Biology of Trauma Induced Coagulopathy (W911NF-10-1-0376) to J.V. for the support of A.S.

## References

1. Nuttall G (1888) Experimente über die bacterienfeindlichen Einflüsse des thierischen Körpers. Z Hyg Infektionskr 4: 353-394.
2. Ricklin D, Hajishengallis G, Yang K, Lambris JD (2010) Complement: a key system for immune surveillance and homeostasis. Nat Immunol 11: 785–797.
3. Ricklin D, Lambris JD (2007) Complement-targeted therapeutics. Nat Biotechnol 25: 1265-1275.
4. Rittirsch D, Flierl MA, Ward PA (2008) Harmful molecular mechanisms in sepsis. Nat Rev Immunol 8: 776–787.
5. Sarma JV, Ward PA (2011) The complement system. Cell Tissue Res 343: 227–235.
6. Ricklin D, Lambris JD (2013) Complement in immune and inflammatory disorders: pathophysiological mechanisms. J Immunol 190: 3831–3838.
7. Walport MJ (2001) Complement. first of two parts. N Engl J Med 344: 1058-66.
8. Walport MJ (2001) Complement. second of two parts. N Engl J Med 344: 1140-4.
9. Pangburn MK, Müller-Eberhard HJ (1984) The alternative pathway of complement. Springer Semin Immunopathol 7: 163–192.
10. Walker D, Yasuhara O, Patston P, McGeer E, McGeer P (1995) Complement c1 inhibitor is produced by brain tissue and is cleaved in alzheimer disease. Brain Res 675: 75–82.
11. Blom AM, Kask L, Dahlbäck B (2001) Structural requirements for the complement regulatory activities of c4bp. J Biol Chem 276: 27136–27144.
12. Riley-Vargas RC, Gill DB, Kemper C, Liszewski MK, Atkinson JP (2004) Cd46: expanding beyond complement regulation. Trends Immunol 25: 496–503.
13. Lukacik P, Roversi P, White J, Esser D, Smith G, et al. (2004) Complement regulation at the molecular level: the structure of decay-accelerating factor. Proc Natl Acad Sci USA 101: 1279–1284.

14. Liszewski MK, Farries TC, Lublin DM, Rooney IA, Atkinson JP (1995) Control of the complement system. *Adv Immunol* 61: 201–283.
15. Chauhan A, Moore T (2006) Presence of plasma complement regulatory proteins clusterin (apo j) and vitronectin (s40) on circulating immune complexes (cic). *Clin Exp Immunol* 145: 398–406.
16. Zewde N, Gorham Jr RD, Dorado A, Morikis D (2016) Quantitative modeling of the alternative pathway of the complement system. *PloS One* 11: e0152337.
17. Hirayama H, Yoshii K, Ojima H, Kawai N, Gotoh S, et al. (1996) Linear systems analysis of activating processes of complement system as a defense mechanism. *Biosystems* 39: 173–185.
18. Korotaevskiy AA, Hanin LG, Khanin MA (2009) Non-linear dynamics of the complement system activation. *Math Biosci* 222: 127–143.
19. Liu B, Zhang J, Tan PY, Hsu D, Blom AM, et al. (2011) A computational and experimental study of the regulatory mechanisms of the complement system. *PLoS Comput Biol* 7: e1001059.
20. Morad HO, Belete SC, Read T, Shaw AM (2015) Time-course analysis of c3a and c5a quantifies the coupling between the upper and terminal complement pathways in vitro. *J Immunol Methods* 427: 13–18.
21. Morgan BP, Harris CL (2015) Complement, a target for therapy in inflammatory and degenerative diseases. *Nat Rev Drug Discov* 14: 857–877.
22. Luan D, Zai M, Varner JD (2007) Computationally derived points of fragility of a human cascade are consistent with current therapeutic strategies. *PLoS Comput Biol* 3: e142.
23. Nayak S, Salim S, Luan D, Zai M, Varner JD (2008) A test of highly optimized tolerance reveals fragile cell-cycle mechanisms are molecular targets in clinical cancer trials. *PLoS One* 3: e2016.



24. Tasseff R, Nayak S, Salim S, Kaushik P, Rizvi N, et al. (2010) Analysis of the molecular networks in androgen dependent and independent prostate cancer revealed fragile and robust subsystems. PLoS One 5: e8864.
25. Rice NT, Szlam F, Varner JD, Bernstein PS, Szlam AD, et al. (2016) Differential contributions of intrinsic and extrinsic pathways to thrombin generation in adult, maternal and cord plasma samples. PLoS One 11: e0154127.
26. Schwaeble HW, Stover CM, Tedford CE, Parent JB, Fujita T (2011). Methods for treating conditions associated with masp-2 dependent complement activation. US Patent 7,919,094.
27. Vogel CW, Fritzinger DC, Hew BE, Thorne M, Bammert H (2004) Recombinant cobra venom factor. Molecular immunology 41: 191–199.
28. Katschke KJ, Wu P, Ganesan R, Kelley RF, Mathieu MA, et al. (2012) Inhibiting alternative pathway complement activation by targeting the factor d exosite. J Biol Chem 287: 12886–12892.
29. Hu X, Holers VM, Thurman JM, Schoeb TR, Ramos TN, et al. (2013) Therapeutic inhibition of the alternative complement pathway attenuates chronic EAE. Mol Immunol 54: 302–308.
30. Bansal R (2014). Humanized and chimeric anti-properdin antibodies. US Patent 8,664,362.
31. Roguska M, Splawski I, Diefenbach-Streiber B, Dolan E, Etemad-Gilbertson B, et al. (2014) Generation and Characterization of LFG316, A Fully-Human Anti-C5 Antibody for the Treatment of Age-Related Macular Degeneration. IOVS 55: 3433–3433.
32. Melis JP, Strumane K, Ruuls SR, Beurskens FJ, Schuurman J, et al. (2015) Complement in therapy and disease: Regulating the complement system with antibody-based therapeutics. Mol Immunol 67: 117–130.
33. Weston-Davies WH, Nunn MA, Pinto FO, Mackie IJ, Richards SJ, et al. (2014) Clini-

cal and immunological characterisation of coversin, a novel small protein inhibitor of complement C5 with potential as a therapeutic agent in PNH and other complement mediated disorders. *Blood* 124: 4280–4280.

34. Epstein D, Kurz JC (2007). Complement binding aptamers and anti-c5 agents useful in the treatment of ocular disorders. US Patent App. 12/224,708.

35. Mastellos DC, Yancopoulou D, Kokkinos P, Huber-Lang M, Hajishengallis G, et al. (2015) Compstatin: a c3-targeted complement inhibitor reaching its prime for bedside intervention. *Eur J Clin Invest* 45: 423-40.

36. Sissons J, Liebowitch J, Amos N, Peters D (1977) Metabolism of the fifth component of complement, and its relation to metabolism of the third component, in patients with complement activation. *J Clin Invest* 59: 704.

37. Swaak A, Hannema A, Vogelaar C, Boom F, van Es L, et al. (1982) Determination of the half-life of c3 in patients and its relation to the presence of c3-breakdown products and/or circulating immune complexes. *Rheumatol Int* : 161–166.

38. Noris M, Galbusera M, Gastoldi S, Macor P, Banterla F, et al. (2014) Dynamics of complement activation in ahus and how to monitor eculizumab therapy. *Blood* : 1715–1726.

39. Sagar A, Varner JD (2015) Dynamic modeling of the human coagulation cascade using reduced order effective kinetic models. *Processes* 3: 178.

40. Bezanson J, Edelman A, Karpinski S, Shah VB (2015) Julia: A fresh approach to numerical computing. *arXiv arXiv:1411.1607v4*.

41. Hindmarsh AC, Brown PN, Grant KE, Lee SL, Serban R, et al. (2005) Sundials: Suite of nonlinear and differential/algebraic equation solvers. *ACM Trans Math Softw* 31: 363–396.

42. Sagar A, Shoemaker CA, Varner J (2016) Dynamic Optimization with Particle Swarms (DOPS): A meta- heuristic for parameter estimation in biochemical models. *Biotech-*

nol J submitted.

43. Tolson BA, Shoemaker CA (2007) Dynamically dimensioned search algorithm for computationally efficient watershed model calibration. *Water Res Research* 43: W01413.
44. Bassen D, Vilkhovoy M, Minot M, Butcher JT, Varner JD (2016) JuPOETs: A Constrained Multiobjective Optimization Approach to Estimate Biochemical Model Ensembles in the Julia Programming Language. *bioRxiv* 10.1101/056044.
45. Sobol I (2001) Global sensitivity indices for nonlinear mathematical models and their Monte Carlo estimates. *Math Comput Simulat* 55: 271 - 280.
46. Saltelli A, Annoni P, Azzini I, Campolongo F, Ratto M, et al. (2010) Variance based sensitivity analysis of model output. design and estimator for the total sensitivity index. *Comput Phys Commun* 181: 259–270.
47. Herman J. Salib: Sensitivity analysis library in python (numpy). contains sobol, morris, fractional factorial and fast methods. available online: <https://github.com/jdherman/salib>.
48. Tasseff R, Nayak S, Song SO, Yen A, Varner JD (2011) Modeling and analysis of retinoic acid induced differentiation of uncommitted precursor cells. *Integr Biol (Camb)* 3: 578-91.

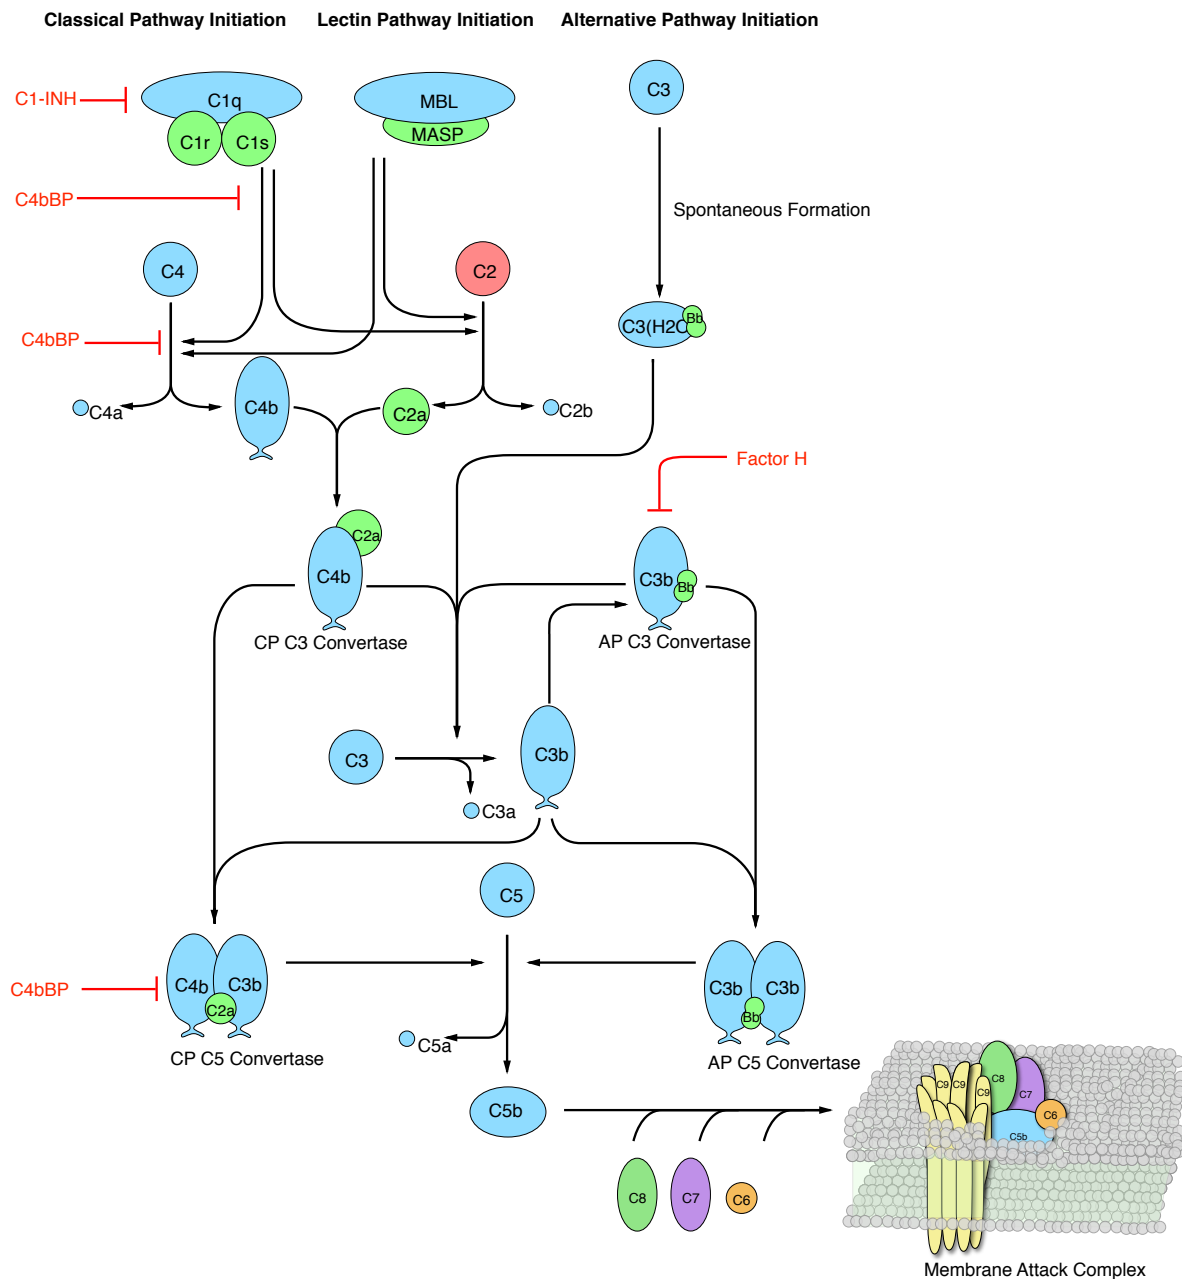

**Fig. 1:** Simplified schematic of the human complement system. The complement cascade is activated through three pathways: the classical, the lectin, and the alternate pathways. Complement initiation results in the formation of classical or alternative C3 convertases, which amplify the initial complement response and signal to the adaptive immune system by cleaving C3 into C3a and C3b. C3 convertases further react to form C5 convertases which catalyze the cleavage of the C5 complement protein to C5a and C5b. C5b is critical to the formation of the membrane attack complex (MAC), while C5a recruits an adaptive immune response.

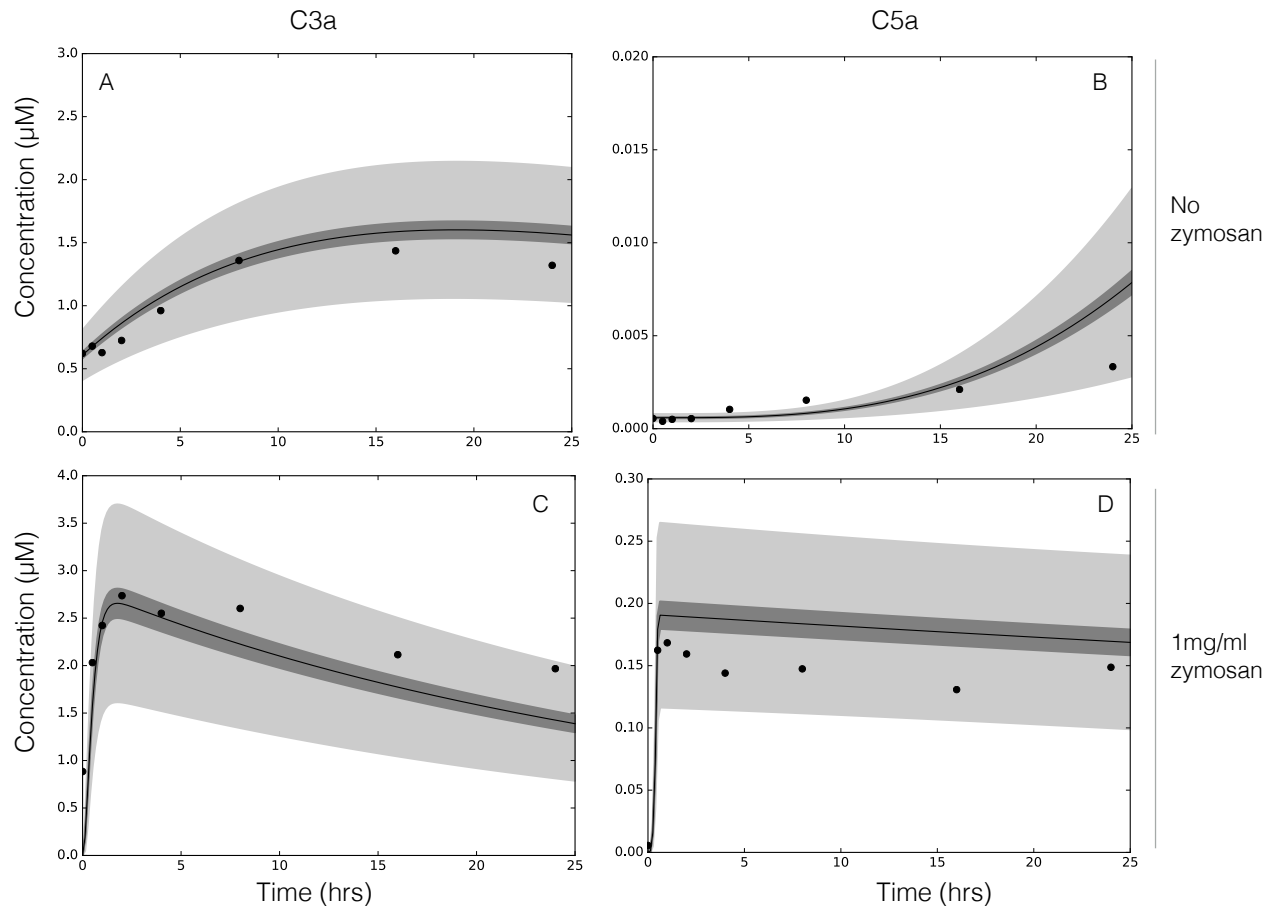

**Fig. 2:** Reduced order complement model training. An ensemble of model parameters were estimated using multiobjective optimization from C3a and C5a measurements with and without zymosan (20). The model was trained using C3a and C5a data generated from the alternative pathway (**A–B**) and lectin pathway initiated with 1 mg/ml zymosan (**C–D**). The solid black lines show the simulated mean value of C3a or C5a for the ensemble, while the dark shaded region denotes the 99% confidence interval of mean. The light shaded region denotes the 99% confidence interval of the simulated C3a and C5a concentration. All initial conditions were assumed to be at their physiological serum levels unless otherwise noted.

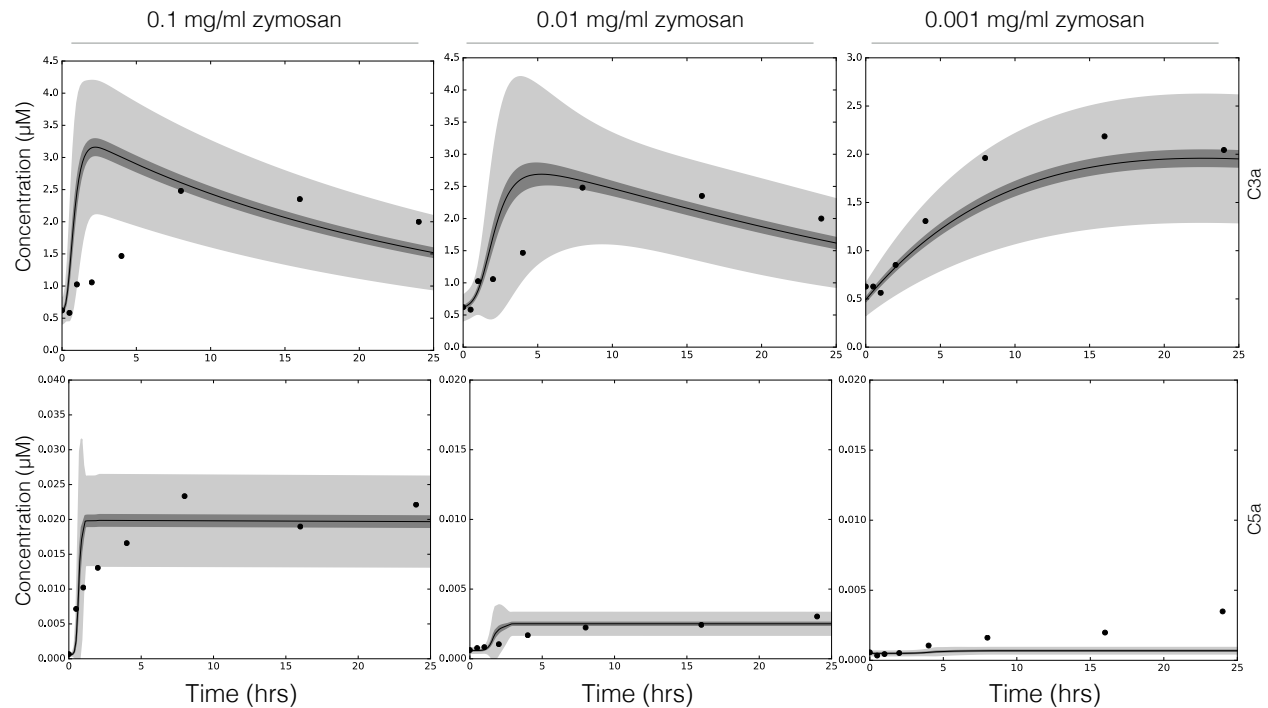

**Fig. 3:** Reduced order complement model predictions. Simulations of C3a and C5a generated in the lectin pathway using 0.1 mg/ml, 0.01 mg/ml, and 0.001 mg/ml zymosan were compared with the corresponding experimental measurements. The solid black lines show the simulated mean value of C3a or C5a for the ensemble, while the dark shaded region denotes the 99% confidence interval of mean. The light shaded region denotes the 99% confidence interval of the simulated C3a and C5a concentration. All initial conditions were assumed to be at their physiological serum levels unless otherwise noted.

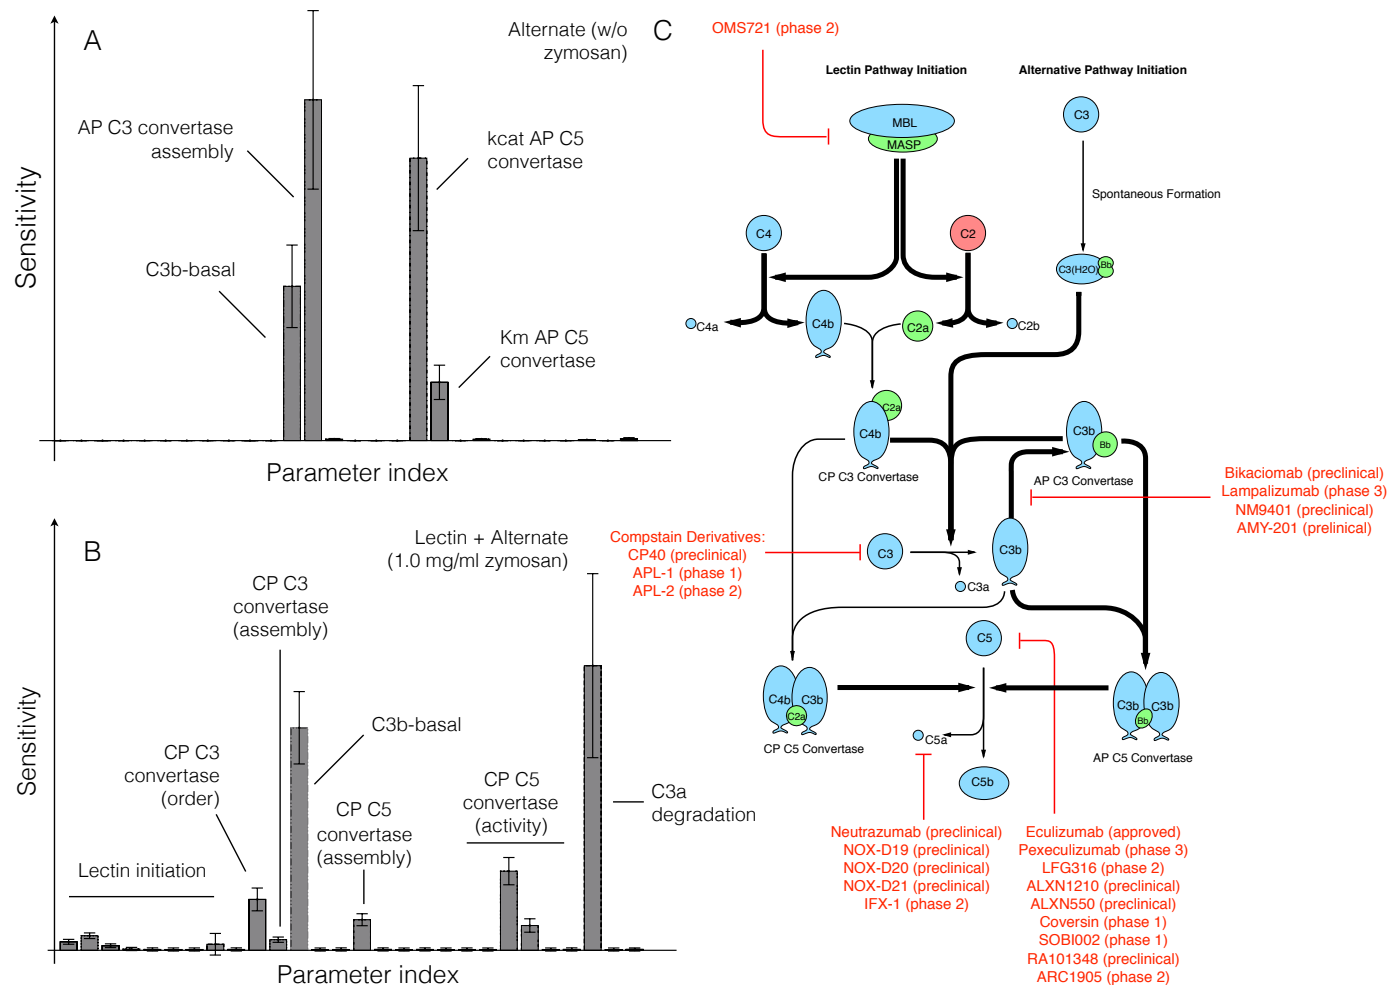

**Fig. 4:** Global sensitivity analysis of the reduced order complement model. Sensitivity analysis was conducted on the two objectives used for model training. **A:** Sensitivity of the C3a and C5a residual w/o zymosan. **B:** Sensitivity of the C3a and C5a residual with 1 mg/ml zymosan. The bars denote the mean total sensitivity index for each parameter, while the error bars denote the 95% confidence interval. **C:** Pathways controlled by the sensitivity parameters. Bold black lines indicate the pathway involves one or more sensitive parameters, while the red lines show current therapeutics targets. Current complement therapeutics were taken from the review of Morgan and Harris (21).

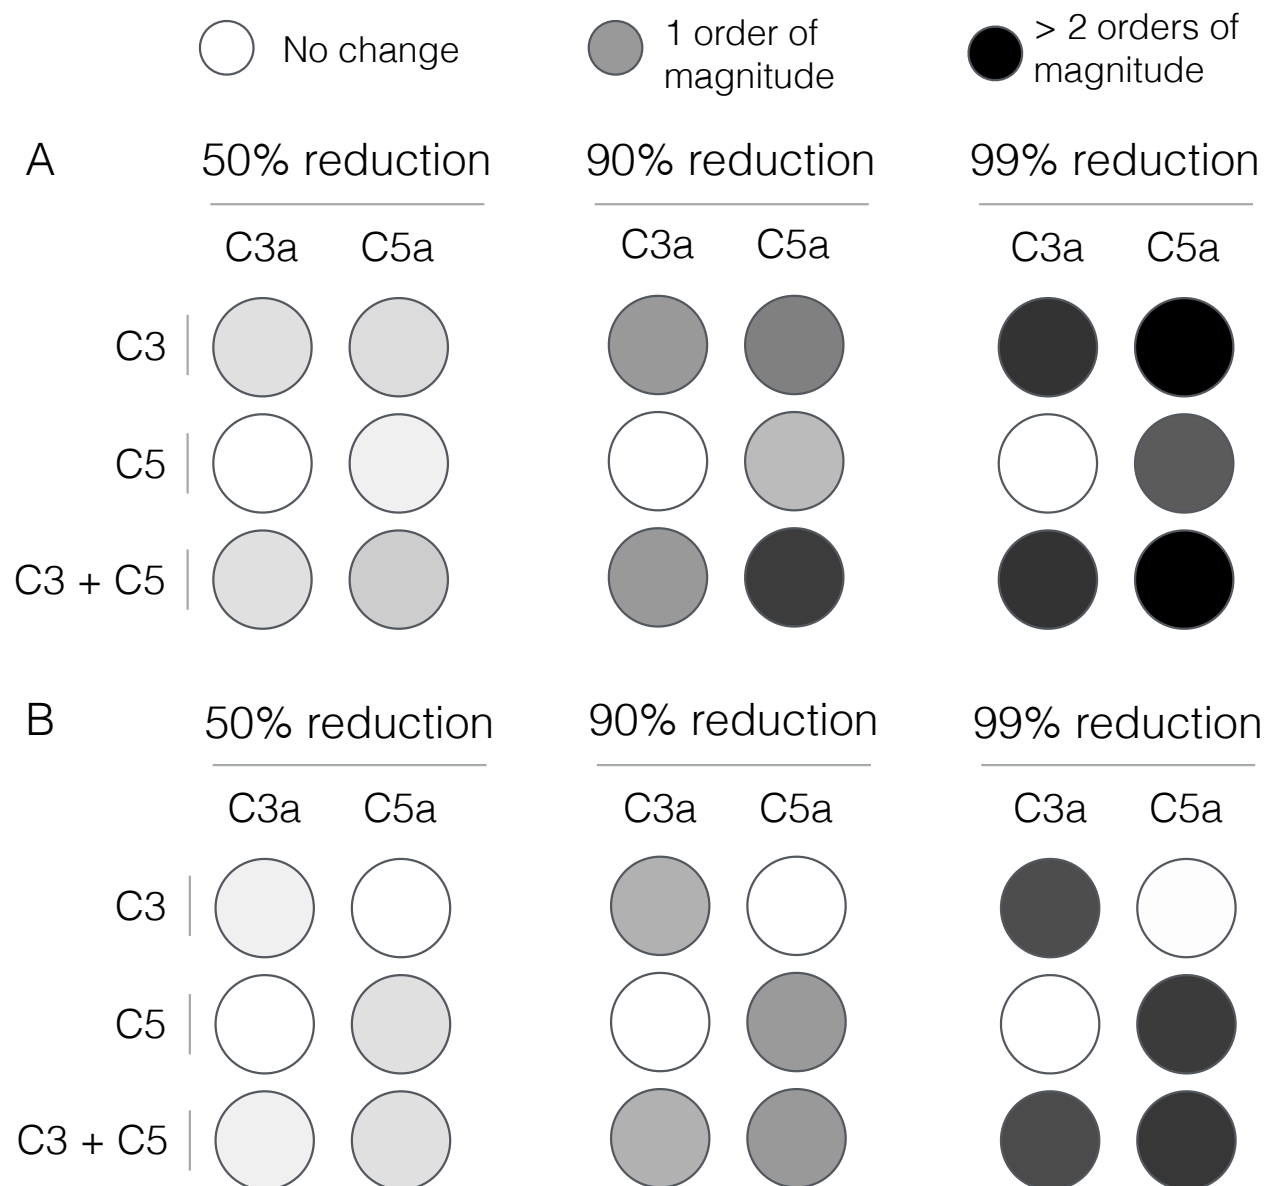

**Fig. 5:** Robustness analysis of the complement model. Robustness coefficients were calculated for a 50%, 90% and 99% reduction in C3, C5, or C3 and C5 initial conditions. **A:** Mean robustness index for C3a and C5a generated from the alternate pathway (w/o zymosan). **B:** Mean robustness index for C3a and C5a generated from the lectin and alternate pathway (1 mg/ml zymosan). The color describes the degree of reduction of C3a or C5a following the network perturbation. Robustness coefficients were calculated using all parameter sets with Pareto rank less than five (N = 65).
